# Supplementary material for: Natural Polymorphisms Are Present in the Furin Cleavage Site of the SARS-CoV-2 Spike Glycoprotein
Source: Front Genet. 2020 Jul 17;11:783. doi: 10.3389/fgene.2020.00783 (PMC7379507; doi:10.3389/fgene.2020.00783)
Supplement: Supplementary file 1 [file Table_1.XLSX]

## Sheet: Point mutation
Strain	gene_id	gene_name	protein_name	mutation	region	type	gisaid_epi_isl	date	entity	division	location	region_exposure	entity_exposure	division_exposure	length	host	age	sex	originating_lab	submitting_lab	authors	url	title	paper_url	date_submitted	X	X.1	X.2	X.3	X.4	X.5	X.6	X.7	X.8	X.9
Taiwan_NTU07_2020	GU280_gp02	S	surface_glycoprotein	Ala684Ala	Asia	synonymous	EPI_ISL_422410	2020-03-13	Taiwan	Taiwan	Taipei	Asia	Japan	Japan	29867	Human	31	Male	Department of Laboratory Medicine	National Taiwan University Hospital	Microbial Genomics Core Lab	National Taiwan University Centers of Genomic and Precision Medicine	Shiou-Hwei Yeh et al	https:__www.gisaid.org	?	?	2020-04-10
Israel_2086004_2020	GU280_gp02	S	surface_glycoprotein	Ala684Glu	Asia	nonsynonymous	EPI_ISL_447381	2020-04-01	Israel	Jerusalem District		Asia	Israel	Jerusalem District	29892	Human	23	Female	Clinical Virology Unit	Hadassah Hebrew University Medical Center	Stern Lab	Stern Lab et al	https:__www.gisaid.org	Full genome viral sequences inform patterns of SARS-CoV-2 spread into and within Israel	https:__dx.doi.org_10.1101_2020.05.21.20104521	2020-05-17
USA_VA-DCLS-0310_2020	GU280_gp02	S	surface_glycoprotein	Ala684Ser	North_America	nonsynonymous	EPI_ISL_463113	2020-05-18	USA	Virginia		North America	USA	Virginia	29873	Human	?	?	Virginia DCLS	Virginia DCLS	Virginia DCLS et al	https:__www.gisaid.org	?	?	2020-06-09
USA_SC-DHEC-0002_2020	GU280_gp02	S	surface_glycoprotein	Ala684Thr	North_America	nonsynonymous	EPI_ISL_462991	2020-05-11	USA	USA		North America	USA	USA	29902	Human	?	?	unknown	Microbiology Division	Flores et al	https:__www.gisaid.org	?	?	2020-06-08
Wales_PHWC-29F13_2020	GU280_gp02	S	surface_glycoprotein	Ala684Thr	Europe	nonsynonymous	EPI_ISL_432199	2020-04-01	United Kingdom	Wales		Europe	United Kingdom	Wales	29903	Human	?	?	Wales Specialist Virology Centre	Public Health Wales Microbiology Cardiff	Catherine Moore et al	https:__www.gisaid.org	Preliminary analysis of SARS-CoV-2 importation & establishment of UK transmission lineages	https:__virological.org_t_preliminary-analysis-of-sars-cov-2-importation-establishment-of-uk-transmission-lineages_507	2020-04-29
Spain_Valencia98_2020	GU280_gp02	S	surface_glycoprotein	Ala684Val	Europe	nonsynonymous	EPI_ISL_425222	2020-03-17	Spain	Comunitat Valenciana	Valencia	Europe	Spain	Comunitat Valenciana	29782	Human	59	Female	Servicio de Microbiolog??a. Consorcio Hospital General Universitario de Valencia	Sequencing and Bioinformatics Service and Molecular Epidemiology Research Group. FISABIO-Public Health	Loreto Ferr??s Abad et al	https:__www.gisaid.org	?	?	2020-04-14
Spain_Valencia293_2020	GU280_gp02	S	surface_glycoprotein	Ala684Val	Europe	nonsynonymous	EPI_ISL_436388	2020-03-17	Spain	Comunitat Valenciana	Valencia	Europe	Spain	Comunitat Valenciana	29804	Human	38	Male	Servicio de Microbiolog??a. Consorcio Hospital General Universitario de Valencia	Sequencing and Bioinformatics Service and Molecular Epidemiology Research Group. FISABIO-Public Health	Neris Garcia-Gonzalez et al	https:__www.gisaid.org	?	?	2020-05-06
Brazil_RJ-1902_2020	GU280_gp02	S	surface_glycoprotein	Ala684Val	South_America	nonsynonymous	EPI_ISL_456090	2020-04-09	Brazil	Rio de Janeiro	Rio de Janeiro	South America	Brazil	Rio de Janeiro	29714	Human	39	Female	Laboratory of Respiratory Viruses and Measles	Oswaldo Cruz Institute	FIOCRUZ	Laboratory of Respiratory Viruses and Measles	Oswaldo Cruz Institute	FIOCRUZ	Paola Resende et al	https:__www.gisaid.org	?	?	2020-06-01
England_LIVE-9CBDB_2020	GU280_gp02	S	surface_glycoprotein	Ala684Val	Europe	nonsynonymous	EPI_ISL_440938	2020-04-26	United Kingdom	England		Europe	United Kingdom	England	29904	Human	?	?	Liverpool Clinical Laboratories	COVID-19 Genomics UK (COG-UK) Consortium	Sam Haldenby et al	https:__www.gisaid.org	Preliminary analysis of SARS-CoV-2 importation & establishment of UK transmission lineages	https:__virological.org_t_preliminary-analysis-of-sars-cov-2-importation-establishment-of-uk-transmission-lineages_507	2020-05-12
England_SHEF-C16AF_2020	GU280_gp02	S	surface_glycoprotein	Ala684Val	Europe	nonsynonymous	EPI_ISL_432728	2020-03-24	United Kingdom	England		Europe	United Kingdom	England	29903	Human	?	?	Virology Department	Sheffield Teaching Hospitals NHS Foundation Trust _ Virology Department	Sheffield Teaching Hospitals NHS Foundation Trust	COVID-19 Genomics UK (COG-UK) Consortium	Thushan de Silva et al	https:__www.gisaid.org	Preliminary analysis of SARS-CoV-2 importation & establishment of UK transmission lineages	https:__virological.org_t_preliminary-analysis-of-sars-cov-2-importation-establishment-of-uk-transmission-lineages_507	2020-04-29
England_LIVE-9DD01_2020	GU280_gp02	S	surface_glycoprotein	Ala684Val	Europe	nonsynonymous	EPI_ISL_449622	2020-04-30	United Kingdom	England		Europe	United Kingdom	England	29903	Human	?	?	Liverpool Clinical Laboratories	COVID-19 Genomics UK (COG-UK) Consortium	Sam Haldenby et al	https:__www.gisaid.org	Preliminary analysis of SARS-CoV-2 importation & establishment of UK transmission lineages	https:__virological.org_t_preliminary-analysis-of-sars-cov-2-importation-establishment-of-uk-transmission-lineages_507	2020-05-19
Brazil_RJ-872_2020	GU280_gp02	S	surface_glycoprotein	Ala684Val	South_America	nonsynonymous	EPI_ISL_427304	2020-03-26	Brazil	Rio de Janeiro	Rio de Janeiro	South America	Brazil	Rio de Janeiro	29774	Human	60	Female	Instituto Oswaldo Cruz FIOCRUZ - Laboratory of Respiratory Viruses and Measles (LVRS)	Instituto Oswaldo Cruz FIOCRUZ - Laboratory of Respiratory Viruses and Measles (LVRS)	Paola Resende et al	https:__www.gisaid.org	COVID-19 in Latin America: Contrasting phylodynamic inference with epidemiological surveillance.	https:__dx.doi.org_10.1101_2020.05.23.20111443	2020-04-18
Denmark_ALAB-SSI-1065_2020	GU280_gp02	S	surface_glycoprotein	Ala688Ser	Europe	nonsynonymous	EPI_ISL_437631	2020-04-02	Denmark	Denmark		Europe	Denmark	Denmark	29903	Human	?	?	Department of Virus and Microbiological Special Diagnostics	Statens Serum Institut	Copenhagen	Denmark	Artillerivej 5	2300 Copenahgen S	Albertsen lab	Department of Chemistry and Bioscience	Aalborg University	Denmark	Rasmus Kirkegaard et al	https:__www.gisaid.org	?	?	2020-05-11
Netherlands_Zeeland_27_2020	GU280_gp02	S	surface_glycoprotein	Ala688Ser	Europe	nonsynonymous	EPI_ISL_461265	2020-04-03	Netherlands	Zeeland		Europe	Netherlands	Zeeland	29775	Human	?	?	Dutch COVID-19 response team	Erasmus Medical Center	Bas Oude Munnink et al	https:__www.gisaid.org	?	?	2020-06-06
England_20149007304_2020	GU280_gp02	S	surface_glycoprotein	Ala688Ser	Europe	nonsynonymous	EPI_ISL_466126	2020-03-30	United Kingdom	England		Europe	United Kingdom	England	29903	Human	80	Male	Respiratory Virus Unit	Microbiology Services Colindale	Public Health England	Respiratory Virus Unit	Microbiology Services Colindale	Public Health England	PHE Covid Sequencing Team et al	https:__www.gisaid.org	?	?	2020-06-11
England_201040375_2020	GU280_gp02	S	surface_glycoprotein	Ala688Val	Europe	nonsynonymous	EPI_ISL_464339	2020-03-04	United Kingdom	England		Europe	United Kingdom	England	29903	Human	81	Male	Respiratory Virus Unit	Microbiology Services Colindale	Public Health England	Respiratory Virus Unit	Microbiology Services Colindale	Public Health England	PHE Covid Sequencing Team et al	https:__www.gisaid.org	?	?	2020-06-11
England_201140350_2020	GU280_gp02	S	surface_glycoprotein	Ala688Val	Europe	nonsynonymous	EPI_ISL_464725	2020-03-10	United Kingdom	England		Europe	United Kingdom	England	29903	Human	81	Male	Respiratory Virus Unit	Microbiology Services Colindale	Public Health England	Respiratory Virus Unit	Microbiology Services Colindale	Public Health England	PHE Covid Sequencing Team et al	https:__www.gisaid.org	?	?	2020-06-11
England_NOTT-110EA8_2020	GU280_gp02	S	surface_glycoprotein	Ala688Val	Europe	nonsynonymous	EPI_ISL_448431	2020-04-29	United Kingdom	England		Europe	United Kingdom	England	29903	Human	?	?	Queens Medical Centre	Clinical Microbiology Department _ DeepSeq Nottingham	COVID-19 Genomics UK (COG-UK) Consortium	Gemma Clark et al	https:__www.gisaid.org	Preliminary analysis of SARS-CoV-2 importation & establishment of UK transmission lineages	https:__virological.org_t_preliminary-analysis-of-sars-cov-2-importation-establishment-of-uk-transmission-lineages_507	2020-05-19
England_201081250_2020	GU280_gp02	S	surface_glycoprotein	Ala688Val	Europe	nonsynonymous	EPI_ISL_464479	2020-03-05	United Kingdom	England		Europe	United Kingdom	England	29903	Human	81	Male	Respiratory Virus Unit	Microbiology Services Colindale	Public Health England	Respiratory Virus Unit	Microbiology Services Colindale	Public Health England	PHE Covid Sequencing Team et al	https:__www.gisaid.org	?	?	2020-06-11
England_20104035803_2020	GU280_gp02	S	surface_glycoprotein	Ala688Val	Europe	nonsynonymous	EPI_ISL_417238	2020-03-03	United Kingdom	England		Europe	United Kingdom	England	29904	Human	80	Male	Respiratory Virus Unit	Microbiology Services Colindale	Public Health England	Respiratory Virus Unit	Microbiology Services Colindale	Public Health England	Monica Galiano et al	https:__www.gisaid.org	Preliminary analysis of SARS-CoV-2 importation & establishment of UK transmission lineages	https:__virological.org_t_preliminary-analysis-of-sars-cov-2-importation-establishment-of-uk-transmission-lineages_507	2020-03-25
Netherlands_NA_506_2020	GU280_gp02	S	surface_glycoprotein	Ala688Val	Europe	nonsynonymous	EPI_ISL_460679	2020-04-03	Netherlands	Netherlands		Europe	Netherlands	Netherlands	29723	Human	?	?	Dutch COVID-19 response team	Erasmus Medical Center	Bas Oude Munnink et al	https:__www.gisaid.org	?	?	2020-06-06
Scotland_EDB2101_2020	GU280_gp02	S	surface_glycoprotein	Ala688Val	Europe	nonsynonymous	EPI_ISL_439152	2020-04-19	United Kingdom	Scotland		Europe	United Kingdom	Scotland	29903	Human	?	?	Virology Department	Royal Infirmary of Edinburgh	NHS Lothian _ School of Biological Sciences	University of Edinburgh _ Institute of Genetics and Molecular Medicine	University of Edinburgh	COVID-19 Genomics UK (COG-UK) Consortium	McHugh M et al	https:__www.gisaid.org	Preliminary analysis of SARS-CoV-2 importation & establishment of UK transmission lineages	https:__virological.org_t_preliminary-analysis-of-sars-cov-2-importation-establishment-of-uk-transmission-lineages_507	2020-05-12
England_20108125404_2020	GU280_gp02	S	surface_glycoprotein	Ala688Val	Europe	nonsynonymous	EPI_ISL_464480	2020-03-05	United Kingdom	England		Europe	United Kingdom	England	29903	Human	81	Male	Respiratory Virus Unit	Microbiology Services Colindale	Public Health England	Respiratory Virus Unit	Microbiology Services Colindale	Public Health England	PHE Covid Sequencing Team et al	https:__www.gisaid.org	?	?	2020-06-11
Wales_PHWC-2658D_2020	GU280_gp02	S	surface_glycoprotein	Ala688Val	Europe	nonsynonymous	EPI_ISL_422346	2020-03-26	United Kingdom	Wales		Europe	United Kingdom	Wales	29873	Human	30	Female	Wales Specialist Virology Centre	Public Health Wales Microbiology Cardiff	Catherine Moore et al	https:__www.gisaid.org	Preliminary analysis of SARS-CoV-2 importation & establishment of UK transmission lineages	https:__virological.org_t_preliminary-analysis-of-sars-cov-2-importation-establishment-of-uk-transmission-lineages_507	2020-04-10
England_OXON-AC710_2020	GU280_gp02	S	surface_glycoprotein	Ala688Val	Europe	nonsynonymous	EPI_ISL_448478	2020-04-05	United Kingdom	England		Europe	United Kingdom	England	29903	Human	?	?	Oxford Viromics	NDM	University of Oxford; Oxford University Hospitals; Basingstoke and North Hampshire Hospital	COVID-19 Genomics UK (COG-UK) Consortium	Tanya Golubchik et al	https:__www.gisaid.org	Preliminary analysis of SARS-CoV-2 importation & establishment of UK transmission lineages	https:__virological.org_t_preliminary-analysis-of-sars-cov-2-importation-establishment-of-uk-transmission-lineages_507	2020-05-19
England_CAMB-752B5_2020	GU280_gp02	S	surface_glycoprotein	Ala688Val	Europe	nonsynonymous	EPI_ISL_440406	2020-03-18	United Kingdom	England		Europe	United Kingdom	England	29782	Human	?	?	Department of Pathology	University of Cambridge	Wellcome Sanger Institute for the COVID-19 Genomics UK Consortium	Luke W Meredith et al	https:__www.gisaid.org	Preliminary analysis of SARS-CoV-2 importation & establishment of UK transmission lineages	https:__virological.org_t_preliminary-analysis-of-sars-cov-2-importation-establishment-of-uk-transmission-lineages_507	2020-05-12
Iceland_557_2020	GU280_gp02	S	surface_glycoprotein	Arg682Arg	Europe	synonymous	EPI_ISL_424577	2020-03-27	Iceland	Reykjavik		Europe	Iceland	Reykjavik	29900	Human	20	Male	The National University Hospital of Iceland	deCODE genetics	Daniel F Gudbjartsson et al	https:__www.gisaid.org	Spread of SARS-CoV-2 in the Icelandic Population	https:__dx.doi.org_10.1056_NEJMoa2006100	2020-04-13
England_PORT-2CFD5F_2020	GU280_gp02	S	surface_glycoprotein	Arg682Arg	Europe	synonymous	EPI_ISL_461992	2020-05-06	United Kingdom	England		Europe	United Kingdom	England	29903	Human	?	?	Centre for Enzyme Innovation	University of Portsmouth _ Translational Research Laboratory	Portsmouth Hospitals NHS Trust	COVID-19 Genomics UK (COG-UK) Consortium	Angela Beckett et al	https:__www.gisaid.org	?	?	2020-06-06
England_PORT-2CF223_2020	GU280_gp02	S	surface_glycoprotein	Arg682Arg	Europe	synonymous	EPI_ISL_453665	2020-04-26	United Kingdom	England		Europe	United Kingdom	England	29903	Human	?	?	Centre for Enzyme Innovation	University of Portsmouth _ Translational Research Laboratory	Portsmouth Hospitals NHS Trust	University of Portsmouth	Angela Beckett et al	https:__www.gisaid.org	Preliminary analysis of SARS-CoV-2 importation & establishment of UK transmission lineages	https:__virological.org_t_preliminary-analysis-of-sars-cov-2-importation-establishment-of-uk-transmission-lineages_507	2020-05-27
Kenya_S052_2020	GU280_gp02	S	surface_glycoprotein	Arg682Arg	Africa	synonymous	EPI_ISL_457932	3???-20	Kenya	Kenya		Africa	Kenya	Kenya	29611	Human	?	?	KEMRI-Centre for Virus Research	KEMRI-Wellcome Trust Research Programme_KEMRI-CGMR-C Kilifi	Githinji G. et al 2020 et al	https:__www.gisaid.org	Introduction and local transmission of SARS-CoV-2 cases in Kenya	https:__virological.org_t_introduction-and-local-transmission-of-sars-cov-2-cases-in-kenya_497	2020-06-02
England_LIVE-9EAEB_2020	GU280_gp02	S	surface_glycoprotein	Arg682Arg	Europe	synonymous	EPI_ISL_453365	2020-04-05	United Kingdom	England		Europe	United Kingdom	England	29875	Human	?	?	Liverpool Clinical Laboratories	COVID-19 Genomics UK (COG-UK) Consortium	Sam Haldenby et al	https:__www.gisaid.org	Preliminary analysis of SARS-CoV-2 importation & establishment of UK transmission lineages	https:__virological.org_t_preliminary-analysis-of-sars-cov-2-importation-establishment-of-uk-transmission-lineages_507	2020-05-27
India_SMSCOV109_2020	GU280_gp02	S	surface_glycoprotein	Arg682Arg	Asia	synonymous	EPI_ISL_454830	2020-04-23	India	Rajasthan	Jaipur	Asia	India	Rajasthan	29878	Human	55	Male	SMS Medical College	Jaipur	CSIR Institute of Genomics and Integrative Biology	Sudhir Bhandari et al	https:__www.gisaid.org	?	?	2020-05-29
USA_PA-MGEL104_2020	GU280_gp02	S	surface_glycoprotein	Arg682Arg	North_America	synonymous	EPI_ISL_454383	2020-03-31	USA	Pennsylvania	Pittsburgh	North America	USA	Pennsylvania	29840	Human	?	?	UPMC Clinical Microbiology Laboratory	Microbial Genome Sequencing Center	Microbial Genomic Epidemiological Laboratory	Mustapha M. Mustapha et al	https:__www.gisaid.org	?	?	2020-05-28
England_PORT-2CFD8C_2020	GU280_gp02	S	surface_glycoprotein	Arg682Arg	Europe	synonymous	EPI_ISL_461995	2020-05-06	United Kingdom	England		Europe	United Kingdom	England	29903	Human	?	?	Centre for Enzyme Innovation	University of Portsmouth _ Translational Research Laboratory	Portsmouth Hospitals NHS Trust	COVID-19 Genomics UK (COG-UK) Consortium	Angela Beckett et al	https:__www.gisaid.org	?	?	2020-06-06
England_LIVE-9B978_2020	GU280_gp02	S	surface_glycoprotein	Arg682Arg	Europe	synonymous	EPI_ISL_440890	2020-04-19	United Kingdom	England		Europe	United Kingdom	England	29903	Human	?	?	Liverpool Clinical Laboratories	COVID-19 Genomics UK (COG-UK) Consortium	Sam Haldenby et al	https:__www.gisaid.org	Preliminary analysis of SARS-CoV-2 importation & establishment of UK transmission lineages	https:__virological.org_t_preliminary-analysis-of-sars-cov-2-importation-establishment-of-uk-transmission-lineages_507	2020-05-12
Hangzhou_ZJU-01_2020	GU280_gp02	S	surface_glycoprotein	Arg682Gln	Asia	nonsynonymous	EPI_ISL_415709	2020-01-25	China	Zhejiang	Hangzhou	Asia	China	Zhejiang	29984	Human	36	Male	State Key Laboratory for Diagnosis and Treatment of Infectious Diseases	National Clinical Research Center for Infectious Diseases	First Affiliated Hospital	Zhejiang University School of Medicine	Hangzhou	China. 310003	State Key Laboratory for Diagnosis and Treatment of Infectious Diseases	National Clinical Research Center for Infectious Diseases	First Affiliated Hospital	Zhejiang University School of Medicine	Hangzhou	China. 310003	Hangping Yao et al	https:__www.gisaid.org	Patient-derived mutations impact pathogenicity of SARS-CoV-2	https:__dx.doi.org_10.1101_2020.04.14.20060160	2020-03-19
Malaysia_IMR_WC1114_2020	GU280_gp02	S	surface_glycoprotein	Arg682Gln	Asia	nonsynonymous	EPI_ISL_455793	2020-02-29	Malaysia	Selangor		Asia	Malaysia	Selangor	29794	Human	36	Female	Institute for Medical Research	Infectious Disease Research Centre	National Institutes of Health	Ministry of Health Malaysia	Malaysia Genome Institute	Mohd Noor Mat Isa et al	https:__www.gisaid.org	?	?	2020-06-01
USA_UN-NR-52282_2020	GU280_gp02	S	surface_glycoprotein	Arg682Gln	North_America	nonsynonymous	EPI_ISL_456656	2020-03-23	USA	USA		North America	USA	USA	29829	Human	?	?	Sequencing and Bioinformatics Center	Sequencing and Bioinformatics Center	Riojas et al	https:__www.gisaid.org	?	?	2020-06-01
England_BRIS-1292CE_2020	GU280_gp02	S	surface_glycoprotein	Arg682Trp	Europe	nonsynonymous	EPI_ISL_458870	2020-04-19	United Kingdom	England		Europe	United Kingdom	England	29782	Human	?	?	PHE South West Regional Laboratory	National Infection Service	Wellcome Sanger Institute for the COVID-19 Genomics UK Consortium	Stephanie Hutchings et al	https:__www.gisaid.org	?	?	2020-06-04
Taiwan_CGMH-CGU-21_2020	GU280_gp02	S	surface_glycoprotein	Arg682Trp	Asia	nonsynonymous	EPI_ISL_444274	2020-02-29	Taiwan	Taiwan	Taoyuan	Asia	Taiwan	Taiwan	29900	Human	?	Female	Laboratory Medicine	Department of Laboratory Medicine	Lin-Kou Chang Gung Memorial Hospital	Taoyuan	Taiwan	Kuo-Chien Tsao et al	https:__www.gisaid.org	?	?	2020-05-13
USA_FL-UF10_2020	GU280_gp02	S	surface_glycoprotein	Arg682Trp	North_America	nonsynonymous	EPI_ISL_447903	2020-04-07	USA	Florida		North America	USA	Florida	29892	Human	?	?	unknown	Environmental and Global Health	Elbadry et al	https:__www.gisaid.org	?	?	2020-05-18
Bangladesh_BCSIR-NILMRC_070_2020	GU280_gp02	S	surface_glycoprotein	Arg683Arg	Asia	synonymous	EPI_ISL_466639	2020-05-26	Bangladesh	Chattogram		Asia	Bangladesh	Chattogram	29887	Human	60	Female	National Institute of Laboratory Medicine and Referral Center	Genomic Research Lab	BCSIR	Abu Sayeed Mohammad Mahmud et al	https:__www.gisaid.org	?	?	2020-06-11
England_CAMB-76A8F_2020	GU280_gp02	S	surface_glycoprotein	Arg683Arg	Europe	synonymous	EPI_ISL_438318	2020-03-29	United Kingdom	England		Europe	United Kingdom	England	29782	Human	?	?	Department of Pathology	University of Cambridge	Wellcome Sanger Institute for the COVID-19 Genomics UK Consortium	Luke W Meredith et al	https:__www.gisaid.org	Preliminary analysis of SARS-CoV-2 importation & establishment of UK transmission lineages	https:__virological.org_t_preliminary-analysis-of-sars-cov-2-importation-establishment-of-uk-transmission-lineages_507	2020-05-12
France_ARA12630_2020	GU280_gp02	S	surface_glycoprotein	Arg683Arg	Europe	synonymous	EPI_ISL_420613	2020-03-23	France	Auvergne-Rh??ne-Alpes	Macon	Europe	France	Auvergne-Rh??ne-Alpes	29879	Human	47	Female	Centre Hospitalier de Macon	CNR Virus des Infections Respiratoires - France SUD	Antonin Bal et al	https:__www.gisaid.org	?	?	2020-04-06
England_201101382_2020	GU280_gp02	S	surface_glycoprotein	Arg683Arg	Europe	synonymous	EPI_ISL_464660	2020-03-09	United Kingdom	England		Europe	United Kingdom	England	29903	Human	55	Male	Respiratory Virus Unit	Microbiology Services Colindale	Public Health England	Respiratory Virus Unit	Microbiology Services Colindale	Public Health England	PHE Covid Sequencing Team et al	https:__www.gisaid.org	?	?	2020-06-11
Finland_13M33_2020	GU280_gp02	S	surface_glycoprotein	Arg683Arg	Europe	synonymous	EPI_ISL_418390	2020-03-13	Finland	Finland		Europe	Finland	Finland	29811	Human	10	Female	Department of Virology and Immunology	University of Helsinki and Helsinki University Hospital	Huslab Finland	Department of Virology	Faculty of Medicine	University of Helsinki	Helsinki	Finland	Teemu Smura et al	https:__www.gisaid.org	?	?	2020-03-30
England_20154092104_2020	GU280_gp02	S	surface_glycoprotein	Arg683Arg	Europe	synonymous	EPI_ISL_466277	2020-04-07	United Kingdom	England		Europe	United Kingdom	England	29900	Human	81	Female	Respiratory Virus Unit	Microbiology Services Colindale	Public Health England	Respiratory Virus Unit	Microbiology Services Colindale	Public Health England	PHE Covid Sequencing Team et al	https:__www.gisaid.org	?	?	2020-06-11
England_CAMB-76BC8_2020	GU280_gp02	S	surface_glycoprotein	Arg683Arg	Europe	synonymous	EPI_ISL_438484	2020-03-29	United Kingdom	England		Europe	United Kingdom	England	29782	Human	?	?	Department of Pathology	University of Cambridge	Wellcome Sanger Institute for the COVID-19 Genomics UK Consortium	Luke W Meredith et al	https:__www.gisaid.org	Preliminary analysis of SARS-CoV-2 importation & establishment of UK transmission lineages	https:__virological.org_t_preliminary-analysis-of-sars-cov-2-importation-establishment-of-uk-transmission-lineages_507	2020-05-12
England_CAMB-1AD2E0_2020	GU280_gp02	S	surface_glycoprotein	Arg683Gln	Europe	nonsynonymous	EPI_ISL_447989	2020-04-29	United Kingdom	England		Europe	United Kingdom	England	29903	Human	?	?	Department of Pathology	University of Cambridge	COVID-19 Genomics UK (COG-UK) Consortium	Luke W Meredith et al	https:__www.gisaid.org	Preliminary analysis of SARS-CoV-2 importation & establishment of UK transmission lineages	https:__virological.org_t_preliminary-analysis-of-sars-cov-2-importation-establishment-of-uk-transmission-lineages_507	2020-05-19
England_CAMB-73800_2020	GU280_gp02	S	surface_glycoprotein	Arg683Gln	Europe	nonsynonymous	EPI_ISL_425243	2020-04-01	United Kingdom	England		Europe	United Kingdom	England	29903	Human	81	Male	Department of Pathology	University of Cambridge	COVID-19 Genomics UK (COG-UK) Consortium	Luke W Meredith et al	https:__www.gisaid.org	Rapid implementation of real-time SARS-CoV-2 sequencing to investigate healthcare-associated COVID-19 infections	https:__dx.doi.org_10.1101_2020.05.08.20095687	2020-04-14
Netherlands_ZuidHolland_37_2020	GU280_gp02	S	surface_glycoprotein	Arg683Pro	Europe	nonsynonymous	EPI_ISL_422909	2020-03-17	Netherlands	South Holland		Europe	Netherlands	South Holland	29775	Human	?	?	Dutch COVID-19 response team	Erasmus Medical Center	Bas Oude Munnink et al	https:__www.gisaid.org	?	?	2020-04-11
England_20132005704_2020	GU280_gp02	S	surface_glycoprotein	Pro681His	Europe	nonsynonymous	EPI_ISL_423723	2020-03-23	United Kingdom	England		Europe	United Kingdom	England	29903	Human	60	Male	Respiratory Virus Unit	Microbiology Services Colindale	Public Health England	Respiratory Virus Unit	Microbiology Services Colindale	Public Health England	Monica Galiano et al	https:__www.gisaid.org	Preliminary analysis of SARS-CoV-2 importation & establishment of UK transmission lineages	https:__virological.org_t_preliminary-analysis-of-sars-cov-2-importation-establishment-of-uk-transmission-lineages_507	2020-04-12
USA_WA-UW-555_2020	GU280_gp02	S	surface_glycoprotein	Pro681His	North_America	nonsynonymous	EPI_ISL_430887	2020-03-12	USA	Washington		North America	USA	Washington	29706	Human	?	?	UW Virology Lab	UW Virology Lab	Pavitra Roychoudhury et al	https:__www.gisaid.org	?	?	2020-04-28
USA_WA-UW-4562_2020	GU280_gp02	S	surface_glycoprotein	Pro681His	North_America	nonsynonymous	EPI_ISL_460624	2020-03-30	USA	Washington		North America	USA	Washington	29658	Human	?	?	UW Virology Lab	UW Virology Lab	Pavitra Roychoudhury et al	https:__www.gisaid.org	?	?	2020-06-06
Scotland_CVR2018_2020	GU280_gp02	S	surface_glycoprotein	Pro681Leu	Europe	nonsynonymous	EPI_ISL_453015	2020-04-09	United Kingdom	Scotland		Europe	United Kingdom	Scotland	29782	Human	?	?	West of Scotland Specialist Virology Centre	NHSGGC _ MRC-University of Glasgow Centre for Virus Research	COVID-19 Genomics UK (COG-UK) Consortium	Ana da Silva Filipe et al	https:__www.gisaid.org	Preliminary analysis of SARS-CoV-2 importation & establishment of UK transmission lineages	https:__virological.org_t_preliminary-analysis-of-sars-cov-2-importation-establishment-of-uk-transmission-lineages_507	2020-05-27
England_CAMB-74140_2020	GU280_gp02	S	surface_glycoprotein	Pro681Leu	Europe	nonsynonymous	EPI_ISL_440369	2020-03-20	United Kingdom	England		Europe	United Kingdom	England	29782	Human	?	?	Department of Pathology	University of Cambridge	Wellcome Sanger Institute for the COVID-19 Genomics UK Consortium	Luke W Meredith et al	https:__www.gisaid.org	Preliminary analysis of SARS-CoV-2 importation & establishment of UK transmission lineages	https:__virological.org_t_preliminary-analysis-of-sars-cov-2-importation-establishment-of-uk-transmission-lineages_507	2020-05-12
USA_VA-DCLS-0300_2020	GU280_gp02	S	surface_glycoprotein	Pro681Leu	North_America	nonsynonymous	EPI_ISL_463103	2020-05-18	USA	Virginia		North America	USA	Virginia	29900	Human	?	?	Virginia DCLS	Virginia DCLS	Virginia DCLS et al	https:__www.gisaid.org	?	?	2020-06-09
USA_VA-DCLS-0111_2020	GU280_gp02	S	surface_glycoprotein	Pro681Leu	North_America	nonsynonymous	EPI_ISL_434603	2020-04-08	USA	Virginia		North America	USA	Virginia	29903	Human	?	?	Virginia DCLS	Virginia DCLS	Virginia DCLS et al	https:__www.gisaid.org	?	?	2020-04-30
USA_VA-DCLS-0112_2020	GU280_gp02	S	surface_glycoprotein	Pro681Leu	North_America	nonsynonymous	EPI_ISL_434604	2020-04-08	USA	Virginia		North America	USA	Virginia	29854	Human	?	?	Virginia DCLS	Virginia DCLS	Virginia DCLS et al	https:__www.gisaid.org	?	?	2020-04-30
England_CAMB-74FCE_2020	GU280_gp02	S	surface_glycoprotein	Pro681Leu	Europe	nonsynonymous	EPI_ISL_440425	2020-03-16	United Kingdom	England		Europe	United Kingdom	England	29782	Human	?	?	Department of Pathology	University of Cambridge	Wellcome Sanger Institute for the COVID-19 Genomics UK Consortium	Luke W Meredith et al	https:__www.gisaid.org	Preliminary analysis of SARS-CoV-2 importation & establishment of UK transmission lineages	https:__virological.org_t_preliminary-analysis-of-sars-cov-2-importation-establishment-of-uk-transmission-lineages_507	2020-05-12
USA_VA-DCLS-0299_2020	GU280_gp02	S	surface_glycoprotein	Pro681Leu	North_America	nonsynonymous	EPI_ISL_463102	2020-05-18	USA	Virginia		North America	USA	Virginia	29861	Human	?	?	Virginia DCLS	Virginia DCLS	Virginia DCLS et al	https:__www.gisaid.org	?	?	2020-06-09
USA_CA-CZB0750_2020	GU280_gp02	S	surface_glycoprotein	Pro681Leu	North_America	nonsynonymous	EPI_ISL_429018	2020-04-03	USA	California	San Francisco	North America	USA	California	29903	Human	?	?	UCSF Clinical Microbiology Laboratory	Chan-Zuckerberg Biohub	CZB Cliahub Consortium et al	https:__www.gisaid.org	?	?	2020-04-23
USA_VA-DCLS-0303_2020	GU280_gp02	S	surface_glycoprotein	Pro681Leu	North_America	nonsynonymous	EPI_ISL_463106	2020-05-18	USA	Virginia		North America	USA	Virginia	29900	Human	?	?	Virginia DCLS	Virginia DCLS	Virginia DCLS et al	https:__www.gisaid.org	?	?	2020-06-09
USA_MDH-9092_2020	GU280_gp02	S	surface_glycoprotein	Pro681Leu	North_America	nonsynonymous	EPI_ISL_454434	2020-03-15	USA	Maryland		North America	USA	Maryland	29853	Human	?	?	Maryland Department of Health Laboratories Administration	Maryland Department of Health Laboratories Administration	MDH Laboratories Administration et al	https:__www.gisaid.org	?	?	2020-05-28
England_CAMB-731BA_2020	GU280_gp02	S	surface_glycoprotein	Pro681Leu	Europe	nonsynonymous	EPI_ISL_440265	2020-03-22	United Kingdom	England		Europe	United Kingdom	England	29782	Human	?	?	Department of Pathology	University of Cambridge	Wellcome Sanger Institute for the COVID-19 Genomics UK Consortium	Luke W Meredith et al	https:__www.gisaid.org	Preliminary analysis of SARS-CoV-2 importation & establishment of UK transmission lineages	https:__virological.org_t_preliminary-analysis-of-sars-cov-2-importation-establishment-of-uk-transmission-lineages_507	2020-05-12
USA_VA-DCLS-0110_2020	GU280_gp02	S	surface_glycoprotein	Pro681Leu	North_America	nonsynonymous	EPI_ISL_434602	2020-04-08	USA	Virginia		North America	USA	Virginia	29851	Human	?	?	Virginia DCLS	Virginia DCLS	Virginia DCLS et al	https:__www.gisaid.org	?	?	2020-04-30
USA_VA-DCLS-0244_2020	GU280_gp02	S	surface_glycoprotein	Pro681Leu	North_America	nonsynonymous	EPI_ISL_452818	2020-04-16	USA	Virginia		North America	USA	Virginia	29893	Human	?	?	Virginia DCLS	Virginia DCLS	Virginia DCLS et al	https:__www.gisaid.org	?	?	2020-05-27
USA_VA-DCLS-0243_2020	GU280_gp02	S	surface_glycoprotein	Pro681Leu	North_America	nonsynonymous	EPI_ISL_452817	2020-04-16	USA	Virginia		North America	USA	Virginia	29896	Human	?	?	Virginia DCLS	Virginia DCLS	Virginia DCLS et al	https:__www.gisaid.org	?	?	2020-05-27
USA_VA-DCLS-0109_2020	GU280_gp02	S	surface_glycoprotein	Pro681Leu	North_America	nonsynonymous	EPI_ISL_434601	2020-04-08	USA	Virginia		North America	USA	Virginia	29897	Human	?	?	Virginia DCLS	Virginia DCLS	Virginia DCLS et al	https:__www.gisaid.org	?	?	2020-04-30
USA_VA-DCLS-0247_2020	GU280_gp02	S	surface_glycoprotein	Pro681Leu	North_America	nonsynonymous	EPI_ISL_452821	2020-04-16	USA	Virginia		North America	USA	Virginia	29848	Human	?	?	Virginia DCLS	Virginia DCLS	Virginia DCLS et al	https:__www.gisaid.org	?	?	2020-05-27
USA_VA-DCLS-0248_2020	GU280_gp02	S	surface_glycoprotein	Pro681Leu	North_America	nonsynonymous	EPI_ISL_452822	2020-04-17	USA	Virginia		North America	USA	Virginia	29817	Human	?	?	Virginia DCLS	Virginia DCLS	Virginia DCLS et al	https:__www.gisaid.org	?	?	2020-05-27
USA_VA-DCLS-0241_2020	GU280_gp02	S	surface_glycoprotein	Pro681Leu	North_America	nonsynonymous	EPI_ISL_452816	2020-04-16	USA	Virginia		North America	USA	Virginia	29854	Human	?	?	Virginia DCLS	Virginia DCLS	Virginia DCLS et al	https:__www.gisaid.org	?	?	2020-05-27
USA_VA-DCLS-0301_2020	GU280_gp02	S	surface_glycoprotein	Pro681Leu	North_America	nonsynonymous	EPI_ISL_463104	2020-05-18	USA	Virginia		North America	USA	Virginia	29887	Human	?	?	Virginia DCLS	Virginia DCLS	Virginia DCLS et al	https:__www.gisaid.org	?	?	2020-06-09
USA_VA-DCLS-0302_2020	GU280_gp02	S	surface_glycoprotein	Pro681Leu	North_America	nonsynonymous	EPI_ISL_463105	2020-05-18	USA	Virginia		North America	USA	Virginia	29900	Human	?	?	Virginia DCLS	Virginia DCLS	Virginia DCLS et al	https:__www.gisaid.org	?	?	2020-06-09
USA_VA-DCLS-0246_2020	GU280_gp02	S	surface_glycoprotein	Pro681Leu	North_America	nonsynonymous	EPI_ISL_452820	2020-04-16	USA	Virginia		North America	USA	Virginia	29828	Human	?	?	Virginia DCLS	Virginia DCLS	Virginia DCLS et al	https:__www.gisaid.org	?	?	2020-05-27
USA_VA-DCLS-0245_2020	GU280_gp02	S	surface_glycoprotein	Pro681Leu	North_America	nonsynonymous	EPI_ISL_452819	2020-04-16	USA	Virginia		North America	USA	Virginia	29896	Human	?	?	Virginia DCLS	Virginia DCLS	Virginia DCLS et al	https:__www.gisaid.org	?	?	2020-05-27
USA_CA-CDPH-UC27_2020	GU280_gp02	S	surface_glycoprotein	Pro681Leu	North_America	nonsynonymous	EPI_ISL_417331	2020-03-13	USA	California	San Francisco	North America	USA	California	29903	Human	?	?	Chiu Laboratory	University of California	San Francisco	Chiu Laboratory	University of California	San Francisco	Xianding Deng et al	https:__www.gisaid.org	Genomic surveillance reveals multiple introductions of SARS-CoV-2 into Northern California	https:__dx.doi.org_10.1126_science.abb9263	2020-03-25
England_BIRM-5FE53_2020	GU280_gp02	S	surface_glycoprotein	Pro681Pro	Europe	synonymous	EPI_ISL_461529	2020	United Kingdom	England		Europe	United Kingdom	England	29903	Human	?	?	University of Birmingham	COVID-19 Genomics UK (COG-UK) Consortium	Loman Lab: Claire McMurray et al	https:__www.gisaid.org	?	?	2020-06-06
England_SHEF-C51E6_2020	GU280_gp02	S	surface_glycoprotein	Pro681Pro	Europe	synonymous	EPI_ISL_432799	2020-03-30	United Kingdom	England		Europe	United Kingdom	England	29900	Human	?	?	Virology Department	Sheffield Teaching Hospitals NHS Foundation Trust _ Virology Department	Sheffield Teaching Hospitals NHS Foundation Trust	COVID-19 Genomics UK (COG-UK) Consortium	Thushan de Silva et al	https:__www.gisaid.org	Preliminary analysis of SARS-CoV-2 importation & establishment of UK transmission lineages	https:__virological.org_t_preliminary-analysis-of-sars-cov-2-importation-establishment-of-uk-transmission-lineages_507	2020-04-29
England_02_2020	GU280_gp02	S	surface_glycoprotein	Pro681Pro	Europe	synonymous	EPI_ISL_407073	2020-01-29	United Kingdom	England		Asia	China	Hubei	29843	Human	23	Male	Respiratory Virus Unit	Microbiology Services Colindale	Public Health England	Respiratory Virus Unit	Microbiology Services Colindale	Public Health England	Monica Galiano et al	https:__www.gisaid.org	Preliminary analysis of SARS-CoV-2 importation & establishment of UK transmission lineages	https:__virological.org_t_preliminary-analysis-of-sars-cov-2-importation-establishment-of-uk-transmission-lineages_507	2020-02-03
England_01_2020	GU280_gp02	S	surface_glycoprotein	Pro681Pro	Europe	synonymous	EPI_ISL_407071	2020-01-29	United Kingdom	England		Asia	China	Hubei	29843	Human	50	Female	Respiratory Virus Unit	Microbiology Services Colindale	Public Health England	Respiratory Virus Unit	Microbiology Services Colindale	Public Health England	Monica Galiano et al	https:__www.gisaid.org	Preliminary analysis of SARS-CoV-2 importation & establishment of UK transmission lineages	https:__virological.org_t_preliminary-analysis-of-sars-cov-2-importation-establishment-of-uk-transmission-lineages_507	2020-02-03
Australia_VIC1666_2020	GU280_gp02	S	surface_glycoprotein	Pro681Ser	Oceania	nonsynonymous	EPI_ISL_456567	2020-05-10	Australia	Victoria		Oceania	Australia	Victoria	29903	Human	71	Male	Victorian Infectious Diseases Reference Laboratory (VIDRL)	Microbiological Diagnostic Unit Public Health Laboratory and Victorian Infectious Diseases Reference Laboratory	Doherty Institute	Caly L. et al	https:__www.gisaid.org	?	?	2020-06-02
Portugal_PT0343_2020	GU280_gp02	S	surface_glycoprotein	Pro681Ser	Europe	nonsynonymous	EPI_ISL_454059	2020-03-17	Portugal	Portugal		Europe	Portugal	Portugal	29763	Human	?	?	unknown	Instituto Nacional de Saude (INSA)	Borges et al et al	https:__www.gisaid.org	?	?	2020-05-28
Portugal_PT0377_2020	GU280_gp02	S	surface_glycoprotein	Pro681Ser	Europe	nonsynonymous	EPI_ISL_454093	2020-03-20	Portugal	Portugal		Europe	Portugal	Portugal	29763	Human	?	?	unknown	Instituto Nacional de Saude (INSA)	Borges et al et al	https:__www.gisaid.org	?	?	2020-05-28
Portugal_PT0155_2020	GU280_gp02	S	surface_glycoprotein	Pro681Ser	Europe	nonsynonymous	EPI_ISL_453871	2020-03-27	Portugal	Portugal		Europe	Portugal	Portugal	29455	Human	?	?	unknown	Instituto Nacional de Saude (INSA)	Borges et al et al	https:__www.gisaid.org	?	?	2020-05-28
Portugal_PT0157_2020	GU280_gp02	S	surface_glycoprotein	Pro681Ser	Europe	nonsynonymous	EPI_ISL_453873	2020-03-27	Portugal	Portugal		Europe	Portugal	Portugal	29653	Human	?	?	unknown	Instituto Nacional de Saude (INSA)	Borges et al et al	https:__www.gisaid.org	?	?	2020-05-28
USA_NY-NYUMC632_2020	GU280_gp02	S	surface_glycoprotein	Ser680Phe	North_America	nonsynonymous	EPI_ISL_444749	2020-04-02	USA	New York	Manhattan	North America	USA	New York	29903	Human	33	Female	NYU Langone Health	Departments of Pathology and Medicine	New York University School of Medicine	Maria Aguero-Rosenfeld et al	https:__www.gisaid.org	?	?	2020-05-14
Canada_ON_PHL4232_2020	GU280_gp02	S	surface_glycoprotein	Ser680Pro	North_America	nonsynonymous	EPI_ISL_418374	2020-03-11	Canada	Ontario		North America	Canada	Ontario	29881	Human	23	Male	Public Health Ontario Laboratories	Public Health Ontario Laboratories	Alireza Eshaghi et al	https:__www.gisaid.org	?	?	2020-03-30
Russia_Krasnodar-63401_2020	GU280_gp02	S	surface_glycoprotein	Ser686Gly	Europe	nonsynonymous	EPI_ISL_428867	2020-03-11	Russia	Krasnodar Region		Europe	Russia	Krasnodar Region	29903	Human	62	Male	State Research Center of Virology and Biotechnology VECTOR	Department of Collection of Microorganisms	State Research Center of Virology and Biotechnology VECTOR	Department of Collection of Microorganisms	Oleg V. Pyankov et al	https:__www.gisaid.org	?	?	2020-04-22
USA_WI-UW-91_2020	GU280_gp02	S	surface_glycoprotein	Ser686Ser	North_America	synonymous	EPI_ISL_425148	2020-04-01	USA	Wisconsin	Waunakee	North America	USA	Wisconsin	29611	Human	?	?	University of Wisconsin-Madison AIDS Vaccine Research Laboratories	University of Wisconsin-Madison AIDS Vaccine Research Laboratories	Gage Moreno et al	https:__www.gisaid.org	?	?	2020-04-14
England_20140005304_2020	GU280_gp02	S	surface_glycoprotein	Ser689Ile	Europe	nonsynonymous	EPI_ISL_423380	2020-03-29	United Kingdom	England		Europe	United Kingdom	England	29903	Human	65	Male	Respiratory Virus Unit	Microbiology Services Colindale	Public Health England	Respiratory Virus Unit	Microbiology Services Colindale	Public Health England	Monica Galiano et al	https:__www.gisaid.org	Preliminary analysis of SARS-CoV-2 importation & establishment of UK transmission lineages	https:__virological.org_t_preliminary-analysis-of-sars-cov-2-importation-establishment-of-uk-transmission-lineages_507	2020-04-12
England_20174040004_2020	GU280_gp02	S	surface_glycoprotein	Ser689Ile	Europe	nonsynonymous	EPI_ISL_465400	2020-04-17	United Kingdom	England		Europe	United Kingdom	England	29903	Human	61	Male	Respiratory Virus Unit	Microbiology Services Colindale	Public Health England	Respiratory Virus Unit	Microbiology Services Colindale	Public Health England	PHE Covid Sequencing Team et al	https:__www.gisaid.org	?	?	2020-06-11
Germany_BAV-MVP0269_2020	GU280_gp02	S	surface_glycoprotein	Ser689Ile	Europe	nonsynonymous	EPI_ISL_466911	2020-05-18	Germany	Bavaria	Munich	Europe	Germany	Bavaria	29903	Human	65	Male	Max von Pettenkofer Institute	Virology	National Reference Center for Retroviruses	LMU M??nchen	Laboratory for Functional Genome Analysis	Dept. Genomics	Gene Center of the LMU Munich	Max Muenchhoff et al	https:__www.gisaid.org	?	?	2020-06-12
France_ARA12265_2020	GU280_gp02	S	surface_glycoprotein	Ser689Ile	Europe	nonsynonymous	EPI_ISL_419186	2020-03-22	France	Auvergne-Rh??ne-Alpes	Bourg-en-Bresse	Europe	France	Auvergne-Rh??ne-Alpes	29877	Human	96	Female	Centre Hospitalier de Bourg en Bresse	CNR Virus des Infections Respiratoires - France SUD	Antonin Bal et al	https:__www.gisaid.org	?	?	2020-04-01
England_20140007302_2020	GU280_gp02	S	surface_glycoprotein	Ser689Ile	Europe	nonsynonymous	EPI_ISL_421925	2020-03-28	United Kingdom	England		Europe	United Kingdom	England	29907	Human	65	Male	Respiratory Virus Unit	Microbiology Services Colindale	Public Health England	Respiratory Virus Unit	Microbiology Services Colindale	Public Health England	Monica Galiano et al	https:__www.gisaid.org	Preliminary analysis of SARS-CoV-2 importation & establishment of UK transmission lineages	https:__virological.org_t_preliminary-analysis-of-sars-cov-2-importation-establishment-of-uk-transmission-lineages_507	2020-04-09
England_NOTT-110AC2_2020	GU280_gp02	S	surface_glycoprotein	Val687Ile	Europe	nonsynonymous	EPI_ISL_441895	2020-04-30	United Kingdom	England		Europe	United Kingdom	England	29903	Human	?	?	Queens Medical Centre	Clinical Microbiology Department _ DeepSeq Nottingham	COVID-19 Genomics UK (COG-UK) Consortium	Gemma Clark et al	https:__www.gisaid.org	Preliminary analysis of SARS-CoV-2 importation & establishment of UK transmission lineages	https:__virological.org_t_preliminary-analysis-of-sars-cov-2-importation-establishment-of-uk-transmission-lineages_507	2020-05-12

## Sheet: Deletion
ID	gene_id	gene_name	custom_annot	mutation	region	gisaid_epi_isl	date	entity	division	location	region_exposure	entity_exposure	division_exposure	length	host	age	sex	originating_lab	submitting_lab	authors	url	title	paper_url	date_submitted
HongKong_XM-PII-S4_2020	GU280_gp02	S	surface_glycoprotein	Asn679_Ala688del	Asia	EPI_ISL_417443	2020-01-22	Hong Kong	Hong Kong	Hong Kong	Asia	Hong Kong	Hong Kong	29808	Human	39	Male	State Key Laboratory for Emerging Infectious Diseases Department of Microbiology Li Ka Shing Faculty of Medicine The University of Hong Kong	State Key Laboratory for Emerging Infectious Diseases Department of Microbiology Li Ka Shing Faculty of Medicine The University of Hong Kong	Pui Wang et al	https:__www.gisaid.org	?	?	2020-03-26

## Sheet: Gain of stop
ID	gene_id	gene_name	custom_annot	mutation	region	gisaid_epi_isl	date	entity	division	location	region_exposure	entity_exposure	division_exposure	length	host	age	sex	originating_lab	submitting_lab	authors	url	title	paper_url	date_submitted
Australia_VIC1477_2020	GU280_gp02	S	surface_glycoprotein	Gln414*	Oceania	EPI_ISL_456452	2020-04-23	Australia	Victoria		Oceania	Australia	Victoria	29902	Human	46	Male	Victorian Infectious Diseases Reference Laboratory (VIDRL)	Microbiological Diagnostic Unit Public Health Laboratory and Victorian Infectious Diseases Reference Laboratory	Doherty Institute	Caly L. et al	https:__www.gisaid.org	?	?	2020-06-02
Australia_VIC813_2020	GU280_gp02	S	surface_glycoprotein	Gln271*	Oceania	EPI_ISL_427086	2020-04-02	Australia	Victoria		Oceania	Australia	Victoria	29903	Human	33	Male	Victorian Infectious Diseases Reference Laboratory (VIDRL)	Microbiological Diagnostic Unit Public Health Laboratory and Victorian Infectious Diseases Reference Laboratory	Doherty Institute	Caly L. et al	https:__www.gisaid.org	?	?	2020-04-17
India_1135_2020	GU280_gp02	S	surface_glycoprotein	Cys432*	Asia	EPI_ISL_424362	2020-03-10	India	India		Asia	Iran	Iran	29856	Human	46	Female	National Influenza Center	Indian Council of Medical Research - National Institute of Virology	Indian Council of Medical Research-National Institute of Virology	Microbial Containment Complex	Pragya D. Yadav et al	https:__www.gisaid.org	Phylogenetic clustering of the Indian SARS-CoV-2 genomes reveals the presence of distinct clades of viral haplotypes among states	https:__www.biorxiv.org_content_10.1101_2020.05.28.122143v1	2020-04-13
India_NCDC-3162_2020	GU280_gp02	S	surface_glycoprotein	Glu516*	Asia	EPI_ISL_436423	2020-04-05	India	Delhi		Asia	Indonesia	Indonesia	29694	Human	43	Male	National Centre for Disease control (NCDC)	NCDC_CSIR-IGIB	Pramod Kumar# et al	https:__www.gisaid.org	Integrated genomic view of SARS-CoV-2 in India	https:__dx.doi.org_10.1101_2020.06.04.128751	2020-05-06
India_NIV-6614_2020	GU280_gp02	S	surface_glycoprotein	Trp258*	Asia	EPI_ISL_454544	2020-04-02	India	Maharashtra		Asia	India	Maharashtra	29903	Human	35	Female	NIV Influenza	NIV Influenza	Potdar V et al	https:__www.gisaid.org	?	?	2020-05-28
Netherlands_ZuidHolland_83_2020	GU280_gp02	S	surface_glycoprotein	Arg408*	Europe	EPI_ISL_422951	2020-03-27	Netherlands	South Holland		Europe	Netherlands	South Holland	29775	Human	?	?	Dutch COVID-19 response team	Erasmus Medical Center	Bas Oude Munnink et al	https:__www.gisaid.org	?	?	2020-04-11
